# Supplementary material for: PRODIG (Prevention of new onset diabetes after transplantation by a short term treatment of Vildagliptin in the early renal post-transplant period) study: study protocol for a randomized controlled study
Source: PubMed Central journal article supplement (PMC6588872; doi:10.1186/s13063-019-3392-6), 2019-06-21

# CPP Ile de France XI

## Committee of Personnel Protection

---

Saint-Germain-en-Laye, May 17, 2018

**CHRU de BESANCON**  
**Ingrid TISSOT**  
**2 place St Jacques**  
**25030 BESANCON CEDEX**

|                     |                                                                                                                                                                     |
|---------------------|---------------------------------------------------------------------------------------------------------------------------------------------------------------------|
| Title of the essay: | « <b>Prévention du diabète de novo après transplantation par un traitement court par vildagliptine dans la période précoce suivant une transplantation rénale</b> » |
| Promotor:           | <b>CHRU DE BESANCON</b>                                                                                                                                             |
| Coordinator:        | <b>Pr Didier DUCLOUX</b>                                                                                                                                            |
| Promotor ref.:      | <b>PRODIG</b>                                                                                                                                                       |
| IDRCB number :      | <b>2016-002023-28</b>                                                                                                                                               |
| Réf. CPP :          | <b>17039</b>                                                                                                                                                        |

|                                                                                                                                                    |          |
|----------------------------------------------------------------------------------------------------------------------------------------------------|----------|
| Request for an opinion, valid authorization, on a category 1 search                                                                                | <b>x</b> |
| Request for an opinion, valid authorization, on a category 2 search                                                                                |          |
| Request for an opinion, valid authorization, on a category 3 search                                                                                |          |
| Request for an advisory opinion on a substantial change of purpose in the use of a collection of elements human biological (art. L. 1211-2 of CSP) |          |
| Request for an Advisory Opinion on a draft declaration of constitution of a collection of human biological samples (art. L. 1243-3 of CSP)         |          |

| Examined documents                                 | Version number and date |
|----------------------------------------------------|-------------------------|
| <b>Notice Mail</b>                                 | 2017/06/19              |
| Additional document                                | November 20, 2017       |
| Insurance                                          | 2017/06/19              |
| Formulaire de demande                              | 2017/06/19              |
| Protocole                                          | V4 of 2017/09/26        |
| Summary                                            | V1 of 2017/06/19        |
| Summary of product characteristics                 | Attachment              |
| Investigators' CV                                  | Attachment              |
| List of investigators                              | V2 of 2017/11/20        |
| Information Form and Patient Informed Consent Form | V3 of 2018/04/19        |
| Certificate of identity                            | 2017/03/08              |
| ReTRANSQOL and EQ-5D questionnaires                | Attachment              |
| Justification of the adequacy of the means         | V1 of 2017/06/19        |

---

Michèle CATZ, présidente – Sabine de la PORTE, Vice-présidente – Jean-François LAIGNEAU, Secrétaire  
 Anne-Elisabeth DECARIS, Assistante  
 Pavillon Jacques Courtois – 2<sup>ème</sup> étage, 20, rue Armagis 78105 Saint Germain en Laye Cedex  
 Tél : 01.39.27.42.58 - Fax : 01.39.27.49.01  
 E.mail : [cppidf11@chi-poissy-st-germain.fr](mailto:cppidf11@chi-poissy-st-germain.fr)

# CPP Ile de France XI

## Committee of Personal Protection

|            |                       |
|------------|-----------------------|
|            | <b>PRODIG</b>         |
| N° IDRCB : | <b>2016-002023-28</b> |
| Réf. CPP : | <b>17039</b>          |

I received the changes requested at the meeting of SEPTEMBER, 14 2017, concerning the research project referenced above.

### Participated in the deliberation :

#### I – FIRST COLLEGE

Annie DURAND  
Agnès GUIBERT  
Gérard LOEB  
Kolia MILOJEVIC  
Sabine de la PORTE

Hospital Pharmacist  
Biostatistician  
Doctor  
Biostatistician  
Searcher

#### II - SECONDE COLLEGE

Christine GHESTEM  
Odile LACHAUD  
Olivier LANTRES  
Christine STOUFFLET

Association of the families of Vésinet  
Representative UDAF 78  
Lawyer  
Philosopher

*No deliberative member of the committee is affected by a conflict of interest.*

Therefore I give the FAVORABLE OPINION of our Committee for this research. Please believe, Madam, the assurance of my best feelings.

**Michèle CATZ, chair of the meeting.**



Supplement: 13063_2019_3392_MOESM3_ESM.pdf [file 13063_2019_3392_MOESM3_ESM.pdf]
