# Supplementary material for: PRODIG (Prevention of new onset diabetes after transplantation by a short term treatment of Vildagliptin in the early renal post-transplant period) study: study protocol for a randomized controlled study
Source: PubMed Central journal article supplement (PMC6588872; doi:10.1186/s13063-019-3392-6), 2019-06-21
Supplement: 13063_2019_3392_MOESM2_ESM.pdf [file 13063_2019_3392_MOESM2_ESM.pdf]

| Legal FINES | Name of the health facility fund manager | Project leader / Investigator coordinator NAME | Project leader / Investigator coordinator FIRST NAME | Project title                                                                                                                              | Project number | Acronym | Escrow authorization (€) |
|-------------|------------------------------------------|------------------------------------------------|------------------------------------------------------|--------------------------------------------------------------------------------------------------------------------------------------------|----------------|---------|--------------------------|
| 250000015   | CHU BESANCON                             | Gaiffe                                         | Emilie                                               | Prevention of new onset diabetes after transplantation by a short term treatment of Vildagliptin in the early renal post-transplant period | PHRC-15-384    | Prodig  | 335 395                  |
